# Supplementary material for: Screening for PFOS and PFOA in European air using passive samplers
Source: Royal Society of Chemistry journal article supplement (doi:10.1039/b921628f), 2010-01-01
Supplement: b921628f.pdf [file b921628f.pdf]

**Table S1** sampling site locations and sampling period (2006)

| <b>UK Transect</b>          |                 |                  |                        |                      |
|-----------------------------|-----------------|------------------|------------------------|----------------------|
| <b>Sites</b>                | <b>Latitude</b> | <b>Longitude</b> | <b>sampling period</b> | <b>sampling days</b> |
| 1) Lancaster                | 54.04N          | 2.80W            | 08/08 - 09/10          | 62                   |
| 2) Blackpool                | 53.78 N         | 3.02W            | 29/07 - 22/09          | 55                   |
| 3) Thornton                 | 53.88N          | 3.01W            | 02/08 - 29/09          | 59                   |
| 4) Barrow-in-Furness        | 54.13N          | 3.20W            | 05/08 - 30/09          | 56                   |
| 5) Sparkbridge              | 54.26N          | 3.07W            | 01/08 - 05/10          | 66                   |
| 6) Wray                     | 54.09N          | 2.67W            | 02/08 - 27/09          | 57                   |
| 7) Preston                  | 53.79N          | 2.75W            | 08/08 -03/10           | 56                   |
| 8) Fleetwood                | 53.93N          | 3.01W            | 13/08 - 07/10          | 60                   |
| 9) Thurnham                 | 53.99N          | 2.83W            | 04/08 - 29/09          | 56                   |
| 10) Kents Bank              | 54.18N          | 3.07W            | 01/08 - 27/09          | 58                   |
| 11) Carnforth               | 54.12N          | 2.78W            | 01/08 - 27/09          | 58                   |
| 12) Ulverston               | 54.18N          | 3.09W            | 01/08 - 26/09          | 57                   |
| 13) Morecambe               | 54.06N          | 2.88W            | 15/08 - 10/10          | 56                   |
| 14) Manchester              | 53.40N          | 2.15W            | 18/08 - 13/10          | 56                   |
| 15) High Muffles            | 54.14N          | 0.46W            | 03/08 - 28/09          | 56                   |
| <b>UK - Norway Transect</b> |                 |                  |                        |                      |
| <b>Sites</b>                | <b>Latitude</b> | <b>Longitude</b> | <b>sampling period</b> | <b>sampling days</b> |
| 16) Hazelrigg               | 54.04N          | 2.80W            | 24/07 - 29/10          | 96                   |
| 17) Ullapool                | 58.05N          | 5.02W            | 19/07 -16/10           | 97                   |
| 18) Colonsay                | 56.10N          | 6.17W            | 20/07 -15/10           | 96                   |
| 19) North Wyke              | 50.75N          | 3.90W            | 23/07 -21/10           | 90                   |
| 20) Aberystwyth             | 52.45N          | 4.02W            | 22/07 -03/10           | 73                   |
| 21) Osen                    | 61.25N          | 11.88E           | 28/06 -02/10           | 96                   |
| 22) Namsvatn                | 64.97N          | 13.60E           | 29/06 -05/10           | 98                   |
| 23) Bodø                    | 67.38N          | 14.64E           | 02/07 -04/10           | 94                   |
| 24) Lakselv                 | 69.83N          | 25.03E           | 03/07 -07/10           | 96                   |
| 25)Fureneset                | 61.33N          | 5.03E            | 04/07 -08/10           | 96                   |
| 26) Ualand                  | 58.53N          | 6.35E            | 26/06 -01/10           | 97                   |
| <b>European Survey</b>      |                 |                  |                        |                      |
| <b>Site</b>                 | <b>Latitude</b> | <b>Longitude</b> | <b>sampling period</b> | <b>sampling days</b> |
| 27) Schmücke                | 50.39N          | 10.46E           | 01/07 - 10/10          | 101                  |
| 28 )Utö                     | 59.47N          | 21.23E           | 30/07 - 02/10          | 71                   |
| 29)Tange                    | 56.21N          | 9.36E            | 07/07 - 06/10          | 91                   |
| 30) Harwell                 | 51.34N          | 1.19W            | 05/07 - 09/10          | 96                   |
| 31) Houtem                  | 51.02N          | 2.58E            | 09/07 - 03/10          | 85                   |
| 32) Aucencorth Moss         | 55.80N          | 3.20E            | 03/07 - 11/10          | 100                  |
| 33) Lille Valby             | 55.41N          | 12.08E           | 13/07 - 13/10          | 92                   |
| 34) Mace Head               | 53.20N          | 9.54W            | 10/07 - 18/10          | 100                  |
| 35) Jarczew                 | 51.19N          | 21.59E           | 10/07 - 10/10          | 92                   |
| 36) Kosetice                | 49.35N          | 15.05E           | 12/07 - 13/10          | 93                   |

**Supplementary Material (ESI) for Journal of Environmental Monitoring**

**This journal is © The Royal Society of Chemistry 2010**

|                   |        |        |               |     |
|-------------------|--------|--------|---------------|-----|
| 37) Iskrba        | 45.34N | 14.52E | 07/07 - 06/10 | 91  |
| 38) Westerland    | 54.56N | 8.19E  | 07/07 - 09/10 | 94  |
| 39) Payerne       | 46.48N | 6.57E  | 05/07 - 11/10 | 98  |
| 40) Hailuoto II   | 65.00N | 24.41E | 05/07 - 05/10 | 92  |
| 41) Warsaw        | 52.16N | 20.58E | 10/07 - 10/10 | 92  |
| 42) Jungfrauoch   | 46.33N | 7.59E  | 06/07 - 13/10 | 99  |
| 43) Kollumerwaard | 53.20N | 6.17E  | 26/07 - 22/11 | 119 |
| 44) Oslo          | 59.55N | 10.44E | 03/07 - 03/10 | 92  |
| 45) Göteborg      | 57.43N | 11.58E | 05/07 - 02/10 | 89  |
| 46) Illmitz       | 47.46N | 16.46E | 22/07 - 02/11 | 102 |
| 47) Ispra         | 45.48N | 8.38E  | 07/09 - 04/12 | 88  |
| 48) Råö           | 57.24N | 11.55E | 05/07 - 02/10 | 89  |
| 49) Chopok        | 48.56N | 19.35E | 02/07 - 03/10 | 93  |
